# Supplementary material
Source: HighWire-hosted journal article supplement (https://www.canjsurg.ca/highwire/filestream/99166/field_highwire_adjunct_files/0/CJS-004923-at-1.pdf)
Supplement: CJS-004923-at-1.pdf [file CJS-004923-at-1.pdf]

**Appendix 1** to Chiu S, Fowler S, Bridges S, et al. A mixed-method study evaluating an innovative care model for rural patients undergoing outpatient breast surgery *Cn J Surg* 2024. Copyright © 2024 The Author(s) or their employer(s).

To receive this resource in an accessible format, please contact us at [cmajgroup@cmaj.ca](mailto:cmajgroup@cmaj.ca).

DOI: 10.1503/cjs004923

*Online appendices are unedited and posted as supplied by the authors.*

## APPENDIX 1

### Semi-Structured Interview Guide

1. Experience with breast cancer surgery
  - *Can you tell me about your experience with breast cancer surgery?*
    - Clarify what they mean, gather details.
    - *How did you feel travelling to Saint John to get the surgery? Had you been to Saint John prior to this?*
2. Experience with Delta Oasis Program
  - *Tell me, what was your experience with the Delta Oasis Program?*
  - *Did the program affect your overall surgery experience?*
    - i. And how did you feel before going into the surgery?
      - a) Did the program affect that?
    - ii. How did you feel your recovery went after the surgery?
      - a) Did the program affect that?
  - Did the program influence the way you feel about Delta Hotels?
    - How?
  - Ask specifics,
    - How were the meals?
    - How was the staff?
3. Do you have suggestions for someone looking to expand this program into other regions or types of surgery?
4. Is there anything further you would like to tell me?
5. Are there any questions that you think I should be asking?
  - If they pose a question: *That's a great question, how would you answer that?*
